# Supplementary material for: Meibomian gland dysfunction and primary Sjögren’s syndrome dry eye: a protocol for systematic review and meta-analysis
Source: PubMed Central journal article supplement — BMJ Open. 2021 Dec 30;11(12):e048336. doi: 10.1136/bmjopen-2020-048336 (PMC8719179; doi:10.1136/bmjopen-2020-048336), 2021-12-30
Supplement: bmjopen-2020-048336.draft_revisions.pdf [file bmjopen-2020-048336.draft_revisions.pdf]

# BMJ Open

BMJ Open is committed to open peer review. As part of this commitment we make the peer review history of every article we publish publicly available.

When an article is published we post the peer reviewers' comments and the authors' responses online. We also post the versions of the paper that were used during peer review. These are the versions that the peer review comments apply to.

The versions of the paper that follow are the versions that were submitted during the peer review process. They are not the versions of record or the final published versions. They should not be cited or distributed as the published version of this manuscript.

BMJ Open is an open access journal and the full, final, typeset and author-corrected version of record of the manuscript is available on our site with no access controls, subscription charges or pay-per-view fees (<http://bmjopen.bmj.com>).

If you have any questions on BMJ Open's open peer review process please email [info.bmjopen@bmj.com](mailto:info.bmjopen@bmj.com)

# BMJ Open

## Meibomian gland dysfunction and primary Sjögren's syndrome dry eye: a protocol for systematic review and meta-analysis

|                               |                                                                                                                                                                                                                                                                                                                                                                                                                                                                        |
|-------------------------------|------------------------------------------------------------------------------------------------------------------------------------------------------------------------------------------------------------------------------------------------------------------------------------------------------------------------------------------------------------------------------------------------------------------------------------------------------------------------|
| Journal:                      | <i>BMJ Open</i>                                                                                                                                                                                                                                                                                                                                                                                                                                                        |
| Manuscript ID                 | bmjopen-2020-048336                                                                                                                                                                                                                                                                                                                                                                                                                                                    |
| Article Type:                 | Protocol                                                                                                                                                                                                                                                                                                                                                                                                                                                               |
| Date Submitted by the Author: | 22-Dec-2020                                                                                                                                                                                                                                                                                                                                                                                                                                                            |
| Complete List of Authors:     | Zi, Changyan; Chengdu University of Traditional Chinese Medicine, huang, qun; Chengdu University of Traditional Chinese Medicine Affiliated Hospital, Ophthalmology<br>Ren, Yuan; Chengdu University of Traditional Chinese Medicine<br>Yao, Huan; Chengdu University of Traditional Chinese Medicine<br>He, Tingting; Chengdu University of Traditional Chinese Medicine<br>Gao, Yongxiang; Chengdu University of Traditional Chinese Medicine, drgaoyx@cdutcm.edu.cn |
| Keywords:                     | RHEUMATOLOGY, OPHTHALMOLOGY, Protocols & guidelines < HEALTH SERVICES ADMINISTRATION & MANAGEMENT, IMMUNOLOGY                                                                                                                                                                                                                                                                                                                                                          |
|                               |                                                                                                                                                                                                                                                                                                                                                                                                                                                                        |

SCHOLARONE™  
Manuscripts

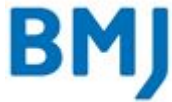

I, the Submitting Author has the right to grant and does grant on behalf of all authors of the Work (as defined in the below author licence), an exclusive licence and/or a non-exclusive licence for contributions from authors who are: i) UK Crown employees; ii) where BMJ has agreed a CC-BY licence shall apply, and/or iii) in accordance with the terms applicable for US Federal Government officers or employees acting as part of their official duties; on a worldwide, perpetual, irrevocable, royalty-free basis to BMJ Publishing Group Ltd ("BMJ") its licensees and where the relevant Journal is co-owned by BMJ to the co-owners of the Journal, to publish the Work in this journal and any other BMJ products and to exploit all rights, as set out in our [licence](#).

The Submitting Author accepts and understands that any supply made under these terms is made by BMJ to the Submitting Author unless you are acting as an employee on behalf of your employer or a postgraduate student of an affiliated institution which is paying any applicable article publishing charge ("APC") for Open Access articles. Where the Submitting Author wishes to make the Work available on an Open Access basis (and intends to pay the relevant APC), the terms of reuse of such Open Access shall be governed by a Creative Commons licence – details of these licences and which [Creative Commons](#) licence will apply to this Work are set out in our licence referred to above.

Other than as permitted in any relevant BMJ Author's Self Archiving Policies, I confirm this Work has not been accepted for publication elsewhere, is not being considered for publication elsewhere and does not duplicate material already published. I confirm all authors consent to publication of this Work and authorise the granting of this licence.

1  
2  
3  
4 Meibomian gland dysfunction and primary Sjögren's syndrome dry eye: a protocol  
5  
6 for systematic review and meta-analysis  
7  
8

9 Changyan Zi,MD<sup>1</sup>, Qun Huang,MM<sup>3</sup>, Yuan Ren,MD<sup>2</sup>, Huan Yao,MD<sup>2</sup>, Tingting  
10  
11 He,MD<sup>2</sup>, Yongxiang Gao,MD<sup>4</sup>  
12  
13

14  
15 <sup>1</sup>Department of Rheumatology, Hospital of Chengdu University of Traditional Chinese  
16  
17 Medicine, Chengdu, 610072,China.  
18

19  
20  
21 <sup>2</sup> College of Clinical Medicine, Chengdu University of Traditional Chinese Medicine,  
22  
23 Chengdu,611137, China  
24

25  
26  
27 <sup>3</sup>Department of Ophthalmology, Hospital of Chengdu University of Traditional  
28  
29 Chinese Medicine, Chengdu, 610072,China.  
30

31  
32  
33 <sup>4</sup>College of International Education of Chengdu University of Traditional Chinese  
34  
35 Medicine, Chengdu, 610072,China.  
36

37  
38  
39 Corresponding author: Yongxiang Gao, College of International Education of Chengdu  
40  
41 University of Traditional Chinese Medicine, No.37 Shi-er-qiao Road, Chengdu 610075,  
42  
43 Sichuan Province, PR China (e-mail:drgaoyx@cductcm.edu.cn)  
44

45  
46  
47 Word count: 1129 words.  
48  
49  
50  
51  
52  
53  
54  
55  
56  
57  
58  
59  
60

## ABSTRACT

**Introduction:** Primary Sjögren's syndrome (pSS) is a systematic autoimmune disorder that primarily affects exocrine glands like lacrimal and salivary glands. Dry eye disease is one of the most prevalent manifestations of pSS. Sjögren's syndrome dry eye (SSDE) is generally described as aqueous-deficient dry eye. As leading pathophysiological mechanism of evaporative dry eye, meibomian gland dysfunction (MGD) also has influence on SSDE presented in the latest studies. We speculate that SSDE is more than aqueous-deficient dry eye. Due to lack of evidence-based association of MGD with SSDE, we will conduct a systematic review and meta-analysis to derive a better estimation of the connection, and investigate whether MGD has relationship with the severity of SSDE.

**Methods and analysis:** The Preferred Reporting items for Systematic Reviews and Meta-Analysis for Protocols (PRISMA-P) 2015 statement was used to implement this protocol. PubMed, Embase, Web of Science, Cochrane Database, China National Knowledge Infrastructure, Wan Fang database will be searched from their inception to 30 April 2021 with restriction of publications in English or Chinese. Two reviewers will independently carry out data extraction and quality assessment. Quality of included studies will be judged by the Newcastle-Ottawa Quality Scale (NOS). We will carry out this meta-analysis via RevMan V.5.4.1. The odds ratio (OR) with 95% confidence interval (CI) will be contained as primary outcome.

**Ethics and dissemination:** Ethical approval is not required since this meta-analysis is performed based on the published studies. The results will be published in a peer-reviewed journal.

**PROSPERO registration number:** PROSPERO submission under review.

### Strengths and limitations of this study

- ▶ This is the first systematic review and meta-analysis to evaluate the relationship between meibomian gland dysfunction and primary Sjögren's syndrome dry eye.
- ▶ Different types of design, diagnostic criteria of pSS, and various evaluation tools of MGD and DED will give a limit to this study, which may restrict quality of the evidence.
- ▶ Subgroup analysis may decrease these restrictions.

## INTRODUCTION

Primary Sjögren's syndrome (pSS) is a female dominated, systematic autoimmune disorder characterized by a widely clinical manifestations ranging from exocrine glands symptoms to extraglandular involvements. Prevalence of pSS is the second highest among rheumatic diseases, next to Rheumatoid Arthritis. As a systematic disease, multidisciplinary cooperation is required, especially department of rheumatology and ophthalmology. Dry eye disease (DED) is usually classified into aqueous-deficient dry eye due to lack of tear secretion and evaporative dry eye which results from tear evaporating too quickly.<sup>1</sup> The mechanism of Sjögren's syndrome dry eye (SSDE) currently remains unclear. In the majority of literatures, SSDE is described as aqueous-deficient dry eye.<sup>2-5</sup> The focus of SSDE turns from pathophysiology of lacrimal glands to eye lids in recent researches,<sup>6</sup> which is stated that meibomian gland dysfunction (MGD) is responsible for SSDE as well.

The International Workshop on Meibomian Gland Dysfunction defines MGD as a chronic, diffuse abnormality of meibomian glands that is commonly characterized by terminal duct obstruction or qualitative or quantitative changes in glandular secretion.<sup>6</sup> As leading pathophysiological mechanism of evaporative dry eye,<sup>7</sup> MGD causes a lesion to tear film lipid layer, and increased tear evaporation and tear hyperosmolarity have been observed, eventually giving rise to onset of dry eye.<sup>8</sup>

To date, assessment for severity of dry eye in pSS has no recognized standards.<sup>9</sup> Symptoms and signs/tests of tear function are included to evaluate it.<sup>10</sup> Nevertheless, there is a discordance between symptoms and signs in SSDE.<sup>11</sup> Currently, proofs have been illustrated that MGD also has influence on SSDE.<sup>12-15</sup> On the basis of these premises, we speculate that SSDE is more than aqueous-deficient dry eye. Owing to lack of evidence-based association of MGD with SSDE, we will conduct a systematic review and meta-analysis to derive a better estimation of the connection, and investigate whether MGD has relationship with the severity of SSDE.

## METHODS

### Registration

This protocol has been registered on the PROSPERO on the 13/12/2020. The Preferred Reporting items for Systematic Reviews and Meta-Analysis for Protocols (PRISMA-P) 2015 statement was used to perform this protocol.<sup>16</sup>

### **Patient and public involvement**

No patient is involved in this study.

### **Search strategy**

PubMed, Embase, Web of Science, Cochrane Database, China National Knowledge Infrastructure, Wan Fang database will be searched from their inception to 30 April 2021 by two reviewers (TH and YR) independently. Combination of Medical Subject Headings (MeSH) and free terms are utilized to search for potentially qualified publications (Table 1). Reference lists of original and review articles will be screened manually.

| Table 1 Search strategy of PubMed                                                                                                                                                                                                                                  |
|--------------------------------------------------------------------------------------------------------------------------------------------------------------------------------------------------------------------------------------------------------------------|
| Search items                                                                                                                                                                                                                                                       |
| #1 "Sjogren's Syndrome" OR "Sjogrens Syndrome" OR "Syndrome, Sjogren's" OR "Sjogren Syndrome" OR "Sicca Syndrome" OR "Syndrome, Sicca"                                                                                                                             |
| #2 "Meibomian Gland Dysfunction" OR "Dysfunction, Meibomian Gland" OR "Meibomian Gland Dysfunctions" OR "MG Dysfunction" OR "MG Dysfunctions"                                                                                                                      |
| #3 #1 AND #2                                                                                                                                                                                                                                                       |
| #4 "Dry Eye Syndromes" OR "Dry Eye Syndrome" OR "Dry Eye Disease" OR "Dry Eye Diseases" OR "Dry Eye" OR "Dry Eyes" OR "Evaporative Dry Eye Disease" OR "Evaporative Dry Eye Syndrome" OR "Evaporative Dry Eye" OR "Dry Eye, Evaporative" OR "Evaporative Dry Eyes" |
| #5 #3 AND #4                                                                                                                                                                                                                                                       |

### **Eligibility criteria**

Study design

1  
2  
3  
4 prospective and retrospective cohort studies, case-control studies published in English or Chinese  
5 will be incorporated in this meta-analysis. In case of similar essays delivered by the same author in  
6 different journals, the latest or study with the largest number of participants will be included.  
7  
8  
9

## 10 Participants

11  
12  
13  
14 The patients with clinical diagnosed pSS connected with dry eye and meibomian gland dysfunction  
15 will be involved, regardless of age, gender and race. The diagnosis of pSS will meet standard  
16 diagnostic criteria, such as ACR/EULAR or AECG(no matter what edition it is). For lack of a  
17 diagnostic gold standard of MDG and DED currently,<sup>17-18</sup> appraisalment of them is based on  
18 evaluation tools made by specialists.  
19  
20  
21  
22  
23

## 24 Outcome

25  
26  
27  
28 The primary outcome defining association of MGD and SSDE is incident of meibomian gland  
29 dysfunction in SSDE patients. The secondary outcomes estimating the severity of SSDE are tear-  
30 film break up time (BUT), Schirmer I test, corneal fluorescein staining(CFS) and ocular surface  
31 disease index (OSDI).  
32  
33  
34  
35  
36

## 37 Study selection and data extraction

### 38 Study selection

39  
40  
41  
42  
43  
44 Two reviewers(TH and YR) will independently conduct study selection. Initial screening of  
45 literatures is based on title and abstract to eliminate that cannot meet the inclusion criteria. During  
46 the process of full-text screening, all potentially eligible studies will be retrieved for inclusion. Any  
47 disagreement will be resolved by discussion. Consulting a third reviewer(YG) to reach a consensus  
48 if an agreement still cannot be reached by discussion. The study selection process is demonstrated  
49 in a PRISMA flow diagram (figure 1). Literatures meet the standards will be imported into Endnote  
50 X9.  
51  
52  
53  
54  
55  
56  
57

### 58 Data extraction



1  
2  
3  
4 The detailed data extracted in an excel spreadsheet by two researchers(HY and QH) and checked  
5 for accuracy by YG are as follows: first author's name, year of publication, country of publication,  
6 study design, sample size, age, gender, duration of pSS, duration of follow-up, diagnostic criteria,  
7 evaluation tools of MGD and DED, outcomes, quality assessment (Newcastle–Ottawa Scale).  
8  
9  
10  
11 Authors of primary studies will be contacted to obtain missing data.  
12  
13

### 14 **Quality assessment**

15  
16  
17  
18 Quality of contained studies will be estimated by two reviewers (HY and QH) with the Newcastle-  
19 Ottawa Quality Scale (NOS) adapted for observational studies. The scale awards 0-9 star based on  
20 the selection, comparability and outcome(cohort) or exposure(case-control). Studies with 0-3 stars,  
21 4-6 stars, or 7-9 stars are considered as a low-, moderate-, or high-quality. Controversies between  
22 two reviewers will be settled by discussion or consulting YG.  
23  
24  
25  
26  
27  
28

### 29 **Data synthesis and statistical analysis**

30  
31  
32 At least 5 studies of same outcomes in similar populations will be pooled to perform the meta-  
33 analysis by RevMan V.5.4.1. Otherwise, a systematic review will be implemented. For categorical  
34 variables, the odds ratio (OR) with 95% confidence interval (CI) will be selected from publications  
35 contained or could be calculated from original data. For continuous variables, standard mean  
36 difference (SMD) with 95%CI will be obtained.  
37  
38  
39  
40  
41  
42

### 43 **Assessment of heterogeneity**

44  
45  
46 Chi-square statistic and the  $I^2$  test are utilized to estimate the statistical heterogeneity among  
47 included studies.  $P \leq 0.1$  is considered as representative of statistically heterogeneity.<sup>19</sup>  $I^2$  values of  
48  $<25\%$ ,  $25\%-50\%$  and  $>50\%$  representing low, medium and high heterogeneity.<sup>20</sup> For a significant  
49 heterogeneity( $I^2 \geq 50\%$ , $P < 0.1$ ), a random-effect model will be selected to synthesize the data.  
50  
51  
52  
53  
54  
55  
56  
57  
58  
59  
60  
Otherwise, a fixed effect model will be used.

### 60 **Subgroup analysis**

1  
2  
3  
4 Subgroup analysis is applied to high heterogeneity among publications included with following  
5 aspects, such as age, sex, diagnostic criteria for pSS, study design, different evaluation tools of  
6 MGD and DED.  
7  
8  
9

### 10 **Sensitivity analysis**

11  
12  
13  
14 Eliminating literatures one by one to conduct sensitivity analysis, possible major source of  
15 heterogeneity may be found.  
16  
17

### 18 **Assessment of publication bias**

19  
20  
21  
22 Visual assessment of the funnel plot will be applied to appraise publication bias if more than 10  
23 articles contained.<sup>21</sup>  
24  
25

### 26 **Quality of evidence**

27  
28  
29  
30 The Grading of Recommendations Assessment, Development and Evaluation(GRADE) will be  
31 used to assess the strength evidence for each outcome, which will be divided into high, moderate,  
32 low and very low level.<sup>22</sup>  
33  
34  
35  
36  
37

### 38 **Ethics and dissemination**

39  
40  
41 Ethical approval is not required since this meta-analysis is performed based on the published studies.  
42  
43 The results will be published in a peer-reviewed journal.  
44  
45

## 46 **DISCUSSION**

47  
48  
49 To our knowledge, this is the first systematic review and meta-analysis to evaluate the relationship  
50 between meibomian gland dysfunction and primary Sjögren's syndrome dry eye. Different types of  
51 design, diagnostic criteria of pSS, and various evaluation tools of MGD and DED will give a limit  
52 to this study, which may restrict quality of the evidence. Yet subgroup analysis may decrease these  
53 restrictions.  
54  
55  
56  
57  
58  
59  
60

1  
2  
3  
4 **Contributors** CZ and QH are joint first authors. CZ designed the study protocol and registered the  
5 protocol on the PROSPERO database. CZ and QH drafted the manuscript. TH and YR will search,  
6 select studies independently, and HY with QH will extract data and assess quality of studies  
7 included. YG will be the third reviewer for study selection, data extraction and quality assessment.  
8 CZ and QH revised the final study. All authors reviewed and approved the final manuscript for  
9 submission.

10  
11  
12  
13  
14  
15  
16 **Funding** This work was supported by Science and technology development fund of Hospital of  
17 Chengdu University of traditional Chinese Medicine(19LW1918MZ12).

18  
19  
20  
21 **Competing interests** None declared.

22  
23 **Patient consent for publication** Not required.

24  
25 **Ethics approval** Not required.

26  
27 **Provenance and peer review** Not commissioned; externally peer reviewed.

28  
29 **Open access** This is an open access article distributed in accordance with the Creative Commons  
30 Attribution Non Commercial (CC BY-NC 4.0) license, which permits others to distribute, remix,  
31 adapt, build upon this work non-commercially, and license their derivative works on different  
32 terms, provided the original work is properly cited, appropriate credit is given, any changes made  
33 indicated, and the use is non-commercial. See: [http://creativecommons.org/licenses/by-nc/4.](http://creativecommons.org/licenses/by-nc/4.0/)  
34  
35  
36  
37  
38  
39 0/.

40  
41 **ORCID iD**

42 Changyan Zi <https://orcid.org/0000-0001-5369-6812>  
43  
44  
45  
46  
47  
48  
49  
50  
51  
52  
53  
54  
55  
56  
57  
58  
59  
60

## REFERENCES

- 1 Craig JP, Nichols KK, Akpek EK, et al. TFOS DEWS II Definition and Classification Report. *The Ocular Surface* 2017;15:276-83.
- 2 Akpek EK, Bunya VY, Saldanha IJ. Sjögren's syndrome: more than just dry eye. *Cornea* 2019;38:658–61.
- 3 Vijmasi T, Chen FY, Chen YT, et al. Topical administration of interleukin-1 receptor antagonist as a therapy for aqueous-deficient dry eye in autoimmune disease. *Mol Vis* 2013;19:1957-65.
- 4 Liew MS, Zhang M, Kim E, et al. Prevalence and predictors of Sjögren's syndrome in a prospective cohort of patients with aqueous-deficient dry eye. *British Journal of Ophthalmology* 2012;96:1498-503.
- 5 Jung HH, Ji YS, Sung MS, et al. Long-term outcome of treatment with topical corticosteroids for severe dry eye associated with Sjögren's syndrome. *Chonnam Med J* 2015;51:26–32.
- 6 Nelson JD, Shimazaki J, Benitez-del-Castillo JM et al. The international workshop on meibomian gland dysfunction: report of the definition and classification subcommittee. *Invest Ophthalmol Vis Sci* 2011;52:1930-7.
- 7 Vehof J, Utheim TP, Bootsma H, et al. Advances, limitations and future perspectives in the diagnosis and management of dry eye in Sjögren's syndrome. *Clinical and Experimental Rheumatology* 2020;38;S301-9.
- 8 Chan TCY, Chow SSW, Wan KHN, et al. Update on the association between dry eye disease and meibomian gland dysfunction. *Hong Kong Med J* 2019;25:38-47.
- 9 Messmer EM. The pathophysiology, diagnosis, and treatment of dry eye disease. *Dtsch Arztebl Int* 2015;112:71-81.
- 10 Foulks GN, Forstot SL, Donshik PC, et al. Clinical guidelines for management of dry eye associated with Sjögren Disease. *The Ocular Surface* 2015;13:118-32.
- 11 Liang H, Kessal K, Rabut G, et al. Correlation of clinical symptoms and signs with conjunctival gene expression in primary Sjögren syndrome dry eye patients. *The Ocular Surface* 2019;17:516-25.
- 12 Menzies KL, Srinivasan S, Prokopich CL, et al. Infrared imaging of meibomian glands and

- 1  
2  
3  
4 evaluation of the lipid layer in Sjogren's syndrome patients and nondry eye controls. *Invest*  
5 *Ophthalmol Vis Sci* 2015;56:836–41.  
6  
7  
8 13 Zang S, Cui Y, Cui Y, et al. Meibomian gland dropout in Sjögren's syndrome and non-  
9 Sjögren's dry eye patients. *Eye* 2018;32:1681–7.  
10  
11  
12 14 Wang Y, Qin Q, Liu B, et al. Clinical Analysis: Aqueous-deficient and meibomian gland  
13 dysfunction in patients with primary sjogren's syndrome. *Front Med (Lausanne)* 2019;6:291.  
14  
15  
16 15 Goto E, Matsumoto Y, Kamoi M, et al. Tear evaporation rates in Sjögren syndrome and non-  
17 Sjögren dry eye patients. *Am J Ophthalmol* 2007;144:81–5.  
18  
19  
20 16 Moher D, Shamseer L, Clarke M, et al. Preferred reporting items for systematic review and  
21 meta- analysis protocols (PRISMA- P) 2015 statement. *Syst Rev* 2015;4:1.  
22  
23  
24 17 Beckman KA, Luchs J, Milner MS. Making the diagnosis of Sjögren's syndrome in patients  
25 with dry eye. *Clin Ophthalmol* 2016;10:43-53.  
26  
27  
28 18 Yoo YS, Na KS, Kim DY, et al. Morphological evaluation for diagnosis of dry eye related to  
29 meibomian gland dysfunction. *Exp Eye Res* 2017;163:72-7.  
30  
31  
32 19 Pandis N. The chi-square test. *Am J Orthod Dentofacial Orthop* 2016;150:898-9.  
33  
34  
35 20 Melsen WG, Bootsma MC, Rovers MM, et al. The effects of clinical and statistical  
36 heterogeneity on the predictive values of results from meta-analyses. *Clin Microbiol Infect*  
37 2014;20:123–9.  
38  
39  
40 21 Debray TPA, Moons KGM, Riley RD. Detecting small-study effects and funnel plot  
41 asymmetry in meta-analysis of survival data: A comparison of new and existing tests. *Res Synth*  
42 *Methods* 2018;9:41-50.  
43  
44  
45 22 Guyatt G, Oxman AD, Akl EA, et al. Grade guidelines: 1. Introduction-GRADE evidence  
46 profiles and summary of findings tables. *J Clin Epidemiol* 2011;64:383–94.  
47  
48  
49  
50  
51  
52  
53  
54  
55  
56  
57  
58  
59  
60

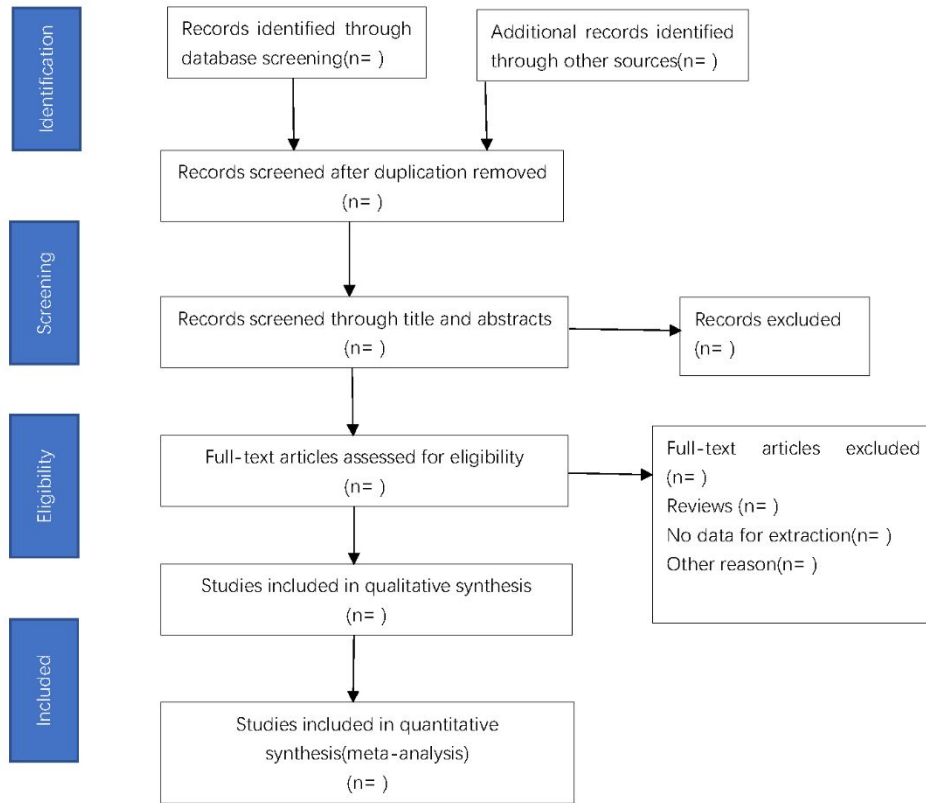

Figure 1 Flow chart and descriptions of study selection.

1  
2  
3  
4  
5  
6  
7  
8  
9  
10  
11  
12  
13  
14  
15  
16  
17  
18  
19  
20  
21  
22  
23  
24  
25  
26  
27  
28  
29  
30  
31  
32  
33  
34  
35  
36  
37  
38  
39  
40  
41  
42  
43  
44  
45  
46  
47  
48  
49  
50  
51  
52  
53  
54  
55  
56  
57  
58  
59  
60

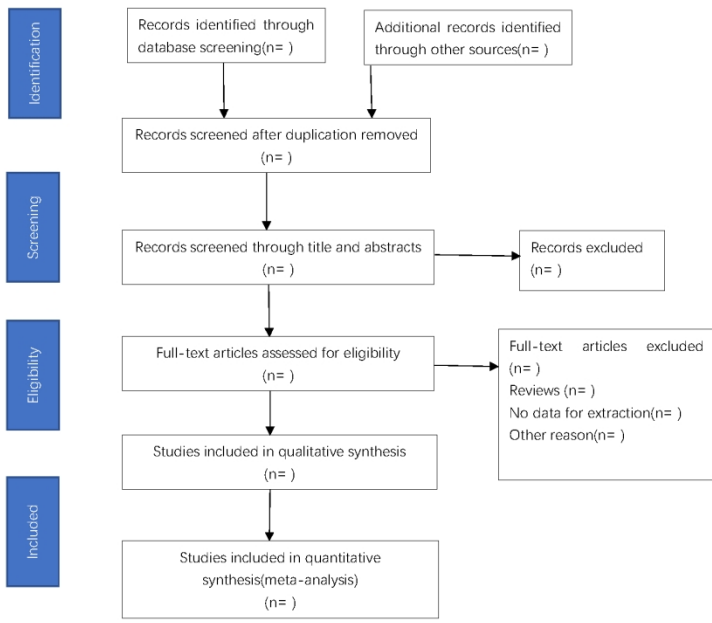

Figure 1. Flow chart and descriptions of study selection.

210x297mm (200 x 200 DPI)

# Reporting checklist for protocol of a systematic review.

Based on the PRISMA-P guidelines.

## Instructions to authors

Complete this checklist by entering the page numbers from your manuscript where readers will find each of the items listed below.

Your article may not currently address all the items on the checklist. Please modify your text to include the missing information. If you are certain that an item does not apply, please write "n/a" and provide a short explanation.

Upload your completed checklist as an extra file when you submit to a journal.

In your methods section, say that you used the PRISMA-Reporting guidelines, and cite them as:

Moher D, Shamseer L, Clarke M, Ghersi D, Liberati A, Petticrew M, Shekelle P, Stewart LA. Preferred Reporting Items for Systematic Review and Meta-Analysis Protocols (PRISMA-P) 2015 statement. Syst Rev. 2015;4(1):1.

|                |                     |                                                                                    | Page   |
|----------------|---------------------|------------------------------------------------------------------------------------|--------|
|                |                     | Reporting Item                                                                     | Number |
| <b>Title</b>   |                     |                                                                                    |        |
| Identification | <a href="#">#1a</a> | Identify the report as a protocol of a systematic review                           | page1  |
| Update         | <a href="#">#1b</a> | If the protocol is for an update of a previous systematic review, identify as such | N/A    |



1 **Registration**  
2  
3

4 [#2](#) If registered, provide the name of the registry (such as page2  
5  
6 PROSPERO) and registration number  
7  
8

9  
10 **Authors**  
11

12  
13 **Contact** [#3a](#) Provide name, institutional affiliation, e-mail address of all page1  
14  
15 protocol authors; provide physical mailing address of  
16  
17 corresponding author  
18

19  
20 **Contribution** [#3b](#) Describe contributions of protocol authors and identify the page 8  
21  
22 guarantor of the review  
23  
24

25  
26 **Amendments**  
27

28  
29 [#4](#) If the protocol represents an amendment of a previously N/A  
30  
31 completed or published protocol, identify as such and list  
32  
33 changes; otherwise, state plan for documenting important  
34  
35 protocol amendments  
36  
37

38  
39 **Support**  
40

41  
42 **Sources** [#5a](#) Indicate sources of financial or other support for the review page 8  
43

44  
45 **Sponsor** [#5b](#) Provide name for the review funder and / or sponsor page 8  
46

47  
48 **Role of sponsor or** [#5c](#) Describe roles of funder(s), sponsor(s), and / or institution(s), page 8  
49  
50 funder  
51 if any, in developing the protocol  
52

53  
54 **Introduction**  
55

56  
57 **Rationale** [#6](#) Describe the rationale for the review in the context of what is page 3  
58

1 already known

2  
3  
4 Objectives [#7](#) Provide an explicit statement of the question(s) the review will page 3,5  
5 address with reference to participants, interventions,  
6 comparators, and outcomes (PICO)  
7  
8  
9

## 10 Methods

11  
12  
13  
14 Eligibility criteria [#8](#) Specify the study characteristics (such as PICO, study design, page 4-5  
15 setting, time frame) and report characteristics (such as years  
16 considered, language, publication status) to be used as  
17 criteria for eligibility for the review  
18  
19  
20  
21  
22  
23

24 Information [#9](#) Describe all intended information sources (such as electronic page 4  
25 sources databases, contact with study authors, trial registers or other  
26 grey literature sources) with planned dates of coverage  
27  
28  
29  
30

31  
32 Search strategy [#10](#) Present draft of search strategy to be used for at least one page 4  
33 electronic database, including planned limits, such that it  
34 could be repeated  
35  
36  
37  
38

39 Study records - [#11a](#) Describe the mechanism(s) that will be used to manage page 5  
40 data management records and data throughout the review  
41  
42  
43

44  
45 Study records - [#11b](#) State the process that will be used for selecting studies (such page 5  
46 selection process as two independent reviewers) through each phase of the  
47 review (that is, screening, eligibility and inclusion in meta-  
48 analysis)  
49  
50  
51  
52  
53

54  
55 Study records - [#11c](#) Describe planned method of extracting data from reports page 5-6  
56 data collection (such as piloting forms, done independently, in duplicate), any  
57  
58  
59

|    |                    |                      |                                                                                 |          |
|----|--------------------|----------------------|---------------------------------------------------------------------------------|----------|
| 1  | process            |                      | processes for obtaining and confirming data from investigators                  |          |
| 2  |                    |                      |                                                                                 |          |
| 3  |                    |                      |                                                                                 |          |
| 4  | Data items         | <a href="#">#12</a>  | List and define all variables for which data will be sought                     | page 6   |
| 5  |                    |                      | (such as PICO items, funding sources), any pre-planned data                     |          |
| 6  |                    |                      | assumptions and simplifications                                                 |          |
| 7  |                    |                      |                                                                                 |          |
| 8  |                    |                      |                                                                                 |          |
| 9  |                    |                      |                                                                                 |          |
| 10 |                    |                      |                                                                                 |          |
| 11 | Outcomes and       | <a href="#">#13</a>  | List and define all outcomes for which data will be sought,                     | page 5   |
| 12 |                    |                      |                                                                                 |          |
| 13 | prioritization     |                      | including prioritization of main and additional outcomes, with                  |          |
| 14 |                    |                      | rationale                                                                       |          |
| 15 |                    |                      |                                                                                 |          |
| 16 |                    |                      |                                                                                 |          |
| 17 |                    |                      |                                                                                 |          |
| 18 |                    |                      |                                                                                 |          |
| 19 | Risk of bias in    | <a href="#">#14</a>  | Describe anticipated methods for assessing risk of bias of                      | page 6   |
| 20 |                    |                      |                                                                                 |          |
| 21 | individual studies |                      | individual studies, including whether this will be done at the                  |          |
| 22 |                    |                      | outcome or study level, or both; state how this information will                |          |
| 23 |                    |                      | be used in data synthesis                                                       |          |
| 24 |                    |                      |                                                                                 |          |
| 25 |                    |                      |                                                                                 |          |
| 26 |                    |                      |                                                                                 |          |
| 27 |                    |                      |                                                                                 |          |
| 28 |                    |                      |                                                                                 |          |
| 29 | Data synthesis     | <a href="#">#15a</a> | Describe criteria under which study data will be quantitatively                 | page 6   |
| 30 |                    |                      | synthesised                                                                     |          |
| 31 |                    |                      |                                                                                 |          |
| 32 |                    |                      |                                                                                 |          |
| 33 |                    |                      |                                                                                 |          |
| 34 | Data synthesis     | <a href="#">#15b</a> | If data are appropriate for quantitative synthesis, describe                    | page 6   |
| 35 |                    |                      | planned summary measures, methods of handling data and                          |          |
| 36 |                    |                      | methods of combining data from studies, including any                           |          |
| 37 |                    |                      | planned exploration of consistency (such as I <sup>2</sup> , Kendall's $\tau$ ) |          |
| 38 |                    |                      |                                                                                 |          |
| 39 |                    |                      |                                                                                 |          |
| 40 |                    |                      |                                                                                 |          |
| 41 |                    |                      |                                                                                 |          |
| 42 |                    |                      |                                                                                 |          |
| 43 |                    |                      |                                                                                 |          |
| 44 | Data synthesis     | <a href="#">#15c</a> | Describe any proposed additional analyses (such as                              | page 6-7 |
| 45 |                    |                      | sensitivity or subgroup analyses, meta-regression)                              |          |
| 46 |                    |                      |                                                                                 |          |
| 47 |                    |                      |                                                                                 |          |
| 48 |                    |                      |                                                                                 |          |
| 49 | Data synthesis     | <a href="#">#15d</a> | If quantitative synthesis is not appropriate, describe the type                 | page 6   |
| 50 |                    |                      | of summary planned                                                              |          |
| 51 |                    |                      |                                                                                 |          |
| 52 |                    |                      |                                                                                 |          |
| 53 |                    |                      |                                                                                 |          |
| 54 |                    |                      |                                                                                 |          |
| 55 | Meta-bias(es)      | <a href="#">#16</a>  | Specify any planned assessment of meta-bias(es) (such as                        | page 7   |
| 56 |                    |                      | publication bias across studies, selective reporting within                     |          |
| 57 |                    |                      |                                                                                 |          |
| 58 |                    |                      |                                                                                 |          |
| 59 |                    |                      |                                                                                 |          |
| 60 |                    |                      |                                                                                 |          |

studies)

1  
2  
3  
4 Confidence in [#17](#) Describe how the strength of the body of evidence will be page 7  
5  
6 cumulative assessed (such as GRADE)  
7  
8 evidence  
9

10  
11 The PRISMA-P checklist is distributed under the terms of the Creative Commons Attribution License  
12  
13 CC-BY 4.0. This checklist was completed on 22. December 2020 using <https://www.goodreports.org/>,  
14  
15 a tool made by the [EQUATOR Network](#) in collaboration with [Penelope.ai](#)  
16  
17  
18  
19  
20  
21  
22  
23  
24  
25  
26  
27  
28  
29  
30  
31  
32  
33  
34  
35  
36  
37  
38  
39  
40  
41  
42  
43  
44  
45  
46  
47  
48  
49  
50  
51  
52  
53  
54  
55  
56  
57  
58  
59  
60

# BMJ Open

## Meibomian gland dysfunction and primary Sjögren's syndrome dry eye: a protocol for systematic review and meta-analysis

|                                 |                                                                                                                                                                                                                                                                                                                                                                                                                                                                        |
|---------------------------------|------------------------------------------------------------------------------------------------------------------------------------------------------------------------------------------------------------------------------------------------------------------------------------------------------------------------------------------------------------------------------------------------------------------------------------------------------------------------|
| Journal:                        | <i>BMJ Open</i>                                                                                                                                                                                                                                                                                                                                                                                                                                                        |
| Manuscript ID                   | bmjopen-2020-048336.R1                                                                                                                                                                                                                                                                                                                                                                                                                                                 |
| Article Type:                   | Protocol                                                                                                                                                                                                                                                                                                                                                                                                                                                               |
| Date Submitted by the Author:   | 10-Aug-2021                                                                                                                                                                                                                                                                                                                                                                                                                                                            |
| Complete List of Authors:       | Zi, Changyan; Chengdu University of Traditional Chinese Medicine, huang, qun; Chengdu University of Traditional Chinese Medicine Affiliated Hospital, Ophthalmology<br>Ren, Yuan; Chengdu University of Traditional Chinese Medicine<br>Yao, Huan; Chengdu University of Traditional Chinese Medicine<br>He, Tingting; Chengdu University of Traditional Chinese Medicine<br>Gao, Yongxiang; Chengdu University of Traditional Chinese Medicine, drgaoyx@cdutcm.edu.cn |
| <b>Primary Subject Heading</b>: | Immunology (including allergy)                                                                                                                                                                                                                                                                                                                                                                                                                                         |
| Secondary Subject Heading:      | Ophthalmology                                                                                                                                                                                                                                                                                                                                                                                                                                                          |
| Keywords:                       | RHEUMATOLOGY, OPHTHALMOLOGY, Protocols & guidelines < HEALTH SERVICES ADMINISTRATION & MANAGEMENT, IMMUNOLOGY                                                                                                                                                                                                                                                                                                                                                          |
|                                 |                                                                                                                                                                                                                                                                                                                                                                                                                                                                        |

SCHOLARONE™  
Manuscripts



I, the Submitting Author has the right to grant and does grant on behalf of all authors of the Work (as defined in the below author licence), an exclusive licence and/or a non-exclusive licence for contributions from authors who are: i) UK Crown employees; ii) where BMJ has agreed a CC-BY licence shall apply, and/or iii) in accordance with the terms applicable for US Federal Government officers or employees acting as part of their official duties; on a worldwide, perpetual, irrevocable, royalty-free basis to BMJ Publishing Group Ltd ("BMJ") its licensees and where the relevant Journal is co-owned by BMJ to the co-owners of the Journal, to publish the Work in this journal and any other BMJ products and to exploit all rights, as set out in our [licence](#).

The Submitting Author accepts and understands that any supply made under these terms is made by BMJ to the Submitting Author unless you are acting as an employee on behalf of your employer or a postgraduate student of an affiliated institution which is paying any applicable article publishing charge ("APC") for Open Access articles. Where the Submitting Author wishes to make the Work available on an Open Access basis (and intends to pay the relevant APC), the terms of reuse of such Open Access shall be governed by a Creative Commons licence – details of these licences and which [Creative Commons](#) licence will apply to this Work are set out in our licence referred to above.

Other than as permitted in any relevant BMJ Author's Self Archiving Policies, I confirm this Work has not been accepted for publication elsewhere, is not being considered for publication elsewhere and does not duplicate material already published. I confirm all authors consent to publication of this Work and authorise the granting of this licence.

1  
2  
3  
4 Meibomian gland dysfunction and primary Sjögren's syndrome dry eye: a protocol  
5  
6 for systematic review and meta-analysis  
7  
8

9 Changyan Zi,MD<sup>1</sup>, Qun Huang,MM<sup>3</sup>, Yuan Ren,MD<sup>2</sup>, Huan Yao,MD<sup>2</sup>, Tingting  
10  
11 He,MD<sup>2</sup>, Yongxiang Gao,MD<sup>4</sup>  
12  
13

14  
15 <sup>1</sup>Department of Rheumatology, Hospital of Chengdu University of Traditional Chinese  
16  
17 Medicine, Chengdu, 610072,China.  
18

19  
20  
21 <sup>2</sup> College of Clinical Medicine, Chengdu University of Traditional Chinese Medicine,  
22  
23 Chengdu,611137, China  
24

25  
26  
27 <sup>3</sup>Department of Ophthalmology, Hospital of Chengdu University of Traditional  
28  
29 Chinese Medicine, Chengdu, 610072,China.  
30

31  
32  
33 <sup>4</sup>College of International Education of Chengdu University of Traditional Chinese  
34  
35 Medicine, Chengdu, 610075,China.  
36

37  
38  
39 Corresponding author: Yongxiang Gao, College of International Education of Chengdu  
40  
41 University of Traditional Chinese Medicine, No.37 Shi-er-qiao Road, Chengdu 610075,  
42  
43 Sichuan Province, PR China (e-mail:drgaoyx@cductcm.edu.cn)  
44

45  
46  
47 Word count: 1289 words.  
48  
49  
50  
51  
52  
53  
54  
55  
56  
57  
58  
59  
60

## ABSTRACT

**Introduction:** Primary Sjögren's syndrome (pSS) is a systematic autoimmune disorder that primarily affects exocrine glands like lacrimal and salivary glands. Dry eye disease (DED) is one of the most prevalent manifestations of pSS and usually classified into aqueous-deficient dry eye and evaporative dry eye. Sjögren's syndrome dry eye (SSDE) is generally described as aqueous-deficient dry eye. However, as leading pathophysiological mechanism of evaporative dry eye, meibomian gland dysfunction (MGD) also has influences on SSDE, which are presented in the latest studies. We speculate that SSDE is more than just aqueous-deficient dry eye. While no related systematic review and meta-analysis has been published, the present study is design to derive a better understanding of the connection between MGD and SSDE.

**Methods and analysis:** The Preferred Reporting items for Systematic Reviews and Meta-Analysis for Protocols (PRISMA-P) 2015 statement was used to prepare this protocol. PubMed, Embase, Web of Science, Cochrane Database, China National Knowledge Infrastructure, Wan Fang database will be searched from their inception to 31 October 2021 with restrictions of publications in English or Chinese. Two reviewers will independently carry out data extraction and quality assessment. The diagnosis of pSS will meet standard diagnostic criteria, such as ACR/EULAR or AECG. The definition of MDG and DED will differ between studies. Quality of included studies will be judged by the Newcastle-Ottawa Quality Scale (NOS). We will carry out this meta-analysis via RevMan V.5.4.1. The incidence of meibomian gland dysfunction in patients with Sjögren's syndrome dry eye will be indicated as odds ratio (OR) with 95% confidence interval (95% CI).

**Ethics and dissemination:** Ethical approval is not required as this meta-analysis is performed based on the published studies. The results will be published in a peer-reviewed journal.

**PROSPERO registration number:** CRD42021226017

### Strengths and limitations of this study

- ▶ This is the first systematic review and meta-analysis to evaluate the relationship between meibomian gland dysfunction and primary Sjögren's syndrome dry eye.
- ▶ Different types of design, diagnostic criteria of pSS, and various evaluation tools of MGD and



1  
2  
3  
4 DED will give a limit to this study, which may restrict quality of the evidence.

5  
6 ▶ Subgroup analysis may decrease these restrictions.  
7

## 8 9 **INTRODUCTION**

10  
11  
12 Primary Sjögren's syndrome(pSS) is a female dominated, systematic autoimmune disorder  
13 characterized by a widely clinical manifestations extending from exocrine glands symptoms to  
14 extraglandular involvements. As a systematic disease, multidisciplinary cooperation is required,  
15 especially department of rheumatology, immunology and ophthalmology. Dry eye disease(DED) is  
16 usually classified into aqueous-deficient dry eye and evaporative dry eye.<sup>1</sup> The mechanism of  
17 Sjögren's syndrome dry eye(SSDE) currently remains unclear. In the majority of literatures, SSDE  
18 is classified as aqueous-deficient dry eye, with much attention being paid to the lack of aqueous tear  
19 production.<sup>2-5</sup> However, meibomian gland dysfunction(MGD) also has been diagnosed in patients  
20 with pSS.<sup>6</sup>  
21  
22  
23  
24  
25  
26  
27  
28  
29

30  
31 The International Workshop on Meibomian Gland Dysfunction defines MGD as a chronic,  
32 diffuse abnormality of meibomian glands, commonly characterized by terminal duct obstruction or  
33 qualitative or quantitative changes in glandular secretion.<sup>7</sup> As leading pathophysiological  
34 mechanism of evaporative dry eye,<sup>8</sup> MGD causes a lesion to tear film lipid layer, which affects the  
35 rate of tear evaporation and tear hyperosmolarity, eventually triggering onset of dry eye.<sup>9</sup>  
36  
37  
38  
39

40  
41 Currently, proofs have been illustrated that MGD has influences on SSDE.<sup>10-13</sup> On the basis of  
42 these premises, we speculate that SSDE is more than just aqueous-deficient dry eye. In this protocol,  
43 we aim to perform a comprehensive review of association between MGD and SSDE.  
44  
45  
46  
47

## 48 49 **METHODS**

### 50 51 **Registration**

52  
53  
54 This protocol has been registered on the PROSPERO on the 13/12/2020. The Preferred Reporting  
55 items for Systematic Reviews and Meta-Analysis for Protocols(PRISMA-P) 2015 statement was  
56 used to perform this protocol.<sup>14</sup>  
57  
58  
59  
60

## Patient and public involvement

No patient is involved in this study.

## Search strategy

PubMed, Embase, Web of Science, Cochrane Database, China National Knowledge Infrastructure, Wan Fang database will be searched from their inception to 31 October 2021 by two reviewers (TH and YR) independently. Combination of Medical Subject Headings (MeSH) and free terms will be utilized to search for potentially qualified publications (Table 1). Reference lists of original and review articles will be screened manually.

| Table 1 Search strategy of PubMed                                                                                                                                                                                                                                  |
|--------------------------------------------------------------------------------------------------------------------------------------------------------------------------------------------------------------------------------------------------------------------|
| Search items                                                                                                                                                                                                                                                       |
| #1 “Sjogren’s Syndrome” OR “Sjogrens Syndrome” OR “Syndrome, Sjogren's” OR “Sjogren Syndrome” OR “Sicca Syndrome” OR “Syndrome, Sicca”                                                                                                                             |
| #2 “Meibomian Gland Dysfunction” OR “Dysfunction, Meibomian Gland” OR “Meibomian Gland Dysfunctions” OR “MG Dysfunction” OR “MG Dysfunctions”                                                                                                                      |
| #3 #1 AND #2                                                                                                                                                                                                                                                       |
| #4 “Dry Eye Syndromes” OR “Dry Eye Syndrome” OR “Dry Eye Disease” OR “Dry Eye Diseases” OR “Dry Eye” OR “Dry Eyes” OR “Evaporative Dry Eye Disease” OR “Evaporative Dry Eye Syndrome” OR “Evaporative Dry Eye” OR “Dry Eye, Evaporative” OR “Evaporative Dry Eyes” |
| #5 #3 AND #4                                                                                                                                                                                                                                                       |

## Eligibility criteria

### Study design

prospective and retrospective cohort studies, case-control studies published in English or Chinese will be incorporated in this meta-analysis. In case of similar essays delivered by the same author in

1  
2  
3 different journals, the latest or study with the largest number of participants will be included.  
4  
5

#### 6 7 Participants

8  
9  
10 The patients with clinical diagnosed pSS connected with dry eye and meibomian gland dysfunction  
11 will be involved, regardless of age, gender and race. The diagnosis of pSS will meet AECG criteria  
12 in 2002<sup>15</sup> or ACR criteria in 2012<sup>16</sup> or ACR/EULAR criteria in 2016.<sup>17</sup> The diagnostic tools for DED  
13 and MGD will differ between studies and be grouped into three categories: symptom questionnaires,  
14  
15  
16  
17  
18 objective ocular testing and biomarkers or other emerging diagnostic techniques.<sup>18-19</sup>  
19

#### 20 21 Outcomes

22  
23  
24 The primary outcome is incident of meibomian gland dysfunction in SSDE patients. The secondary  
25 outcomes mainly include the following aspects: tear-film break up time (BUT), Schirmer I test,  
26  
27  
28 corneal fluorescein staining(CFS) and ocular surface disease index (OSDI).  
29

#### 30 31 **Study selection and data extraction**

##### 32 33 34 Study selection

35  
36  
37  
38 Two reviewers(TH and YR) will independently conduct study selection. Based on title and abstract,  
39  
40  
41  
42  
43  
44  
45  
46  
47  
48  
49  
50  
51  
52  
53  
54  
55  
56  
57  
58  
59  
60  
61  
62  
63  
64  
65  
66  
67  
68  
69  
70  
71  
72  
73  
74  
75  
76  
77  
78  
79  
80  
81  
82  
83  
84  
85  
86  
87  
88  
89  
90  
91  
92  
93  
94  
95  
96  
97  
98  
99  
100  
101  
102  
103  
104  
105  
106  
107  
108  
109  
110  
111  
112  
113  
114  
115  
116  
117  
118  
119  
120  
121  
122  
123  
124  
125  
126  
127  
128  
129  
130  
131  
132  
133  
134  
135  
136  
137  
138  
139  
140  
141  
142  
143  
144  
145  
146  
147  
148  
149  
150  
151  
152  
153  
154  
155  
156  
157  
158  
159  
160  
161  
162  
163  
164  
165  
166  
167  
168  
169  
170  
171  
172  
173  
174  
175  
176  
177  
178  
179  
180  
181  
182  
183  
184  
185  
186  
187  
188  
189  
190  
191  
192  
193  
194  
195  
196  
197  
198  
199  
200  
201  
202  
203  
204  
205  
206  
207  
208  
209  
210  
211  
212  
213  
214  
215  
216  
217  
218  
219  
220  
221  
222  
223  
224  
225  
226  
227  
228  
229  
230  
231  
232  
233  
234  
235  
236  
237  
238  
239  
240  
241  
242  
243  
244  
245  
246  
247  
248  
249  
250  
251  
252  
253  
254  
255  
256  
257  
258  
259  
260  
261  
262  
263  
264  
265  
266  
267  
268  
269  
270  
271  
272  
273  
274  
275  
276  
277  
278  
279  
280  
281  
282  
283  
284  
285  
286  
287  
288  
289  
290  
291  
292  
293  
294  
295  
296  
297  
298  
299  
300  
301  
302  
303  
304  
305  
306  
307  
308  
309  
310  
311  
312  
313  
314  
315  
316  
317  
318  
319  
320  
321  
322  
323  
324  
325  
326  
327  
328  
329  
330  
331  
332  
333  
334  
335  
336  
337  
338  
339  
340  
341  
342  
343  
344  
345  
346  
347  
348  
349  
350  
351  
352  
353  
354  
355  
356  
357  
358  
359  
360  
361  
362  
363  
364  
365  
366  
367  
368  
369  
370  
371  
372  
373  
374  
375  
376  
377  
378  
379  
380  
381  
382  
383  
384  
385  
386  
387  
388  
389  
390  
391  
392  
393  
394  
395  
396  
397  
398  
399  
400  
401  
402  
403  
404  
405  
406  
407  
408  
409  
410  
411  
412  
413  
414  
415  
416  
417  
418  
419  
420  
421  
422  
423  
424  
425  
426  
427  
428  
429  
430  
431  
432  
433  
434  
435  
436  
437  
438  
439  
440  
441  
442  
443  
444  
445  
446  
447  
448  
449  
450  
451  
452  
453  
454  
455  
456  
457  
458  
459  
460  
461  
462  
463  
464  
465  
466  
467  
468  
469  
470  
471  
472  
473  
474  
475  
476  
477  
478  
479  
480  
481  
482  
483  
484  
485  
486  
487  
488  
489  
490  
491  
492  
493  
494  
495  
496  
497  
498  
499  
500  
501  
502  
503  
504  
505  
506  
507  
508  
509  
510  
511  
512  
513  
514  
515  
516  
517  
518  
519  
520  
521  
522  
523  
524  
525  
526  
527  
528  
529  
530  
531  
532  
533  
534  
535  
536  
537  
538  
539  
540  
541  
542  
543  
544  
545  
546  
547  
548  
549  
550  
551  
552  
553  
554  
555  
556  
557  
558  
559  
560  
561  
562  
563  
564  
565  
566  
567  
568  
569  
570  
571  
572  
573  
574  
575  
576  
577  
578  
579  
580  
581  
582  
583  
584  
585  
586  
587  
588  
589  
590  
591  
592  
593  
594  
595  
596  
597  
598  
599  
600  
601  
602  
603  
604  
605  
606  
607  
608  
609  
610  
611  
612  
613  
614  
615  
616  
617  
618  
619  
620  
621  
622  
623  
624  
625  
626  
627  
628  
629  
630  
631  
632  
633  
634  
635  
636  
637  
638  
639  
640  
641  
642  
643  
644  
645  
646  
647  
648  
649  
650  
651  
652  
653  
654  
655  
656  
657  
658  
659  
660  
661  
662  
663  
664  
665  
666  
667  
668  
669  
670  
671  
672  
673  
674  
675  
676  
677  
678  
679  
680  
681  
682  
683  
684  
685  
686  
687  
688  
689  
690  
691  
692  
693  
694  
695  
696  
697  
698  
699  
700  
701  
702  
703  
704  
705  
706  
707  
708  
709  
710  
711  
712  
713  
714  
715  
716  
717  
718  
719  
720  
721  
722  
723  
724  
725  
726  
727  
728  
729  
730  
731  
732  
733  
734  
735  
736  
737  
738  
739  
740  
741  
742  
743  
744  
745  
746  
747  
748  
749  
750  
751  
752  
753  
754  
755  
756  
757  
758  
759  
760  
761  
762  
763  
764  
765  
766  
767  
768  
769  
770  
771  
772  
773  
774  
775  
776  
777  
778  
779  
780  
781  
782  
783  
784  
785  
786  
787  
788  
789  
790  
791  
792  
793  
794  
795  
796  
797  
798  
799  
800  
801  
802  
803  
804  
805  
806  
807  
808  
809  
810  
811  
812  
813  
814  
815  
816  
817  
818  
819  
820  
821  
822  
823  
824  
825  
826  
827  
828  
829  
830  
831  
832  
833  
834  
835  
836  
837  
838  
839  
840  
841  
842  
843  
844  
845  
846  
847  
848  
849  
850  
851  
852  
853  
854  
855  
856  
857  
858  
859  
860  
861  
862  
863  
864  
865  
866  
867  
868  
869  
870  
871  
872  
873  
874  
875  
876  
877  
878  
879  
880  
881  
882  
883  
884  
885  
886  
887  
888  
889  
890  
891  
892  
893  
894  
895  
896  
897  
898  
899  
900  
901  
902  
903  
904  
905  
906  
907  
908  
909  
910  
911  
912  
913  
914  
915  
916  
917  
918  
919  
920  
921  
922  
923  
924  
925  
926  
927  
928  
929  
930  
931  
932  
933  
934  
935  
936  
937  
938  
939  
940  
941  
942  
943  
944  
945  
946  
947  
948  
949  
950  
951  
952  
953  
954  
955  
956  
957  
958  
959  
960  
961  
962  
963  
964  
965  
966  
967  
968  
969  
970  
971  
972  
973  
974  
975  
976  
977  
978  
979  
980  
981  
982  
983  
984  
985  
986  
987  
988  
989  
990  
991  
992  
993  
994  
995  
996  
997  
998  
999  
1000

##### 52 Data extraction

53  
54  
55  
56 The detailed data extracted in an excel spreadsheet by two researchers(HY and QH) and checked  
57 for accuracy by YG are as follows: first author's name, year of publication, country of publication,  
58  
59  
60  
61  
62  
63  
64  
65  
66  
67  
68  
69  
70  
71  
72  
73  
74  
75  
76  
77  
78  
79  
80  
81  
82  
83  
84  
85  
86  
87  
88  
89  
90  
91  
92  
93  
94  
95  
96  
97  
98  
99  
100  
101  
102  
103  
104  
105  
106  
107  
108  
109  
110  
111  
112  
113  
114  
115  
116  
117  
118  
119  
120  
121  
122  
123  
124  
125  
126  
127  
128  
129  
130  
131  
132  
133  
134  
135  
136  
137  
138  
139  
140  
141  
142  
143  
144  
145  
146  
147  
148  
149  
150  
151  
152  
153  
154  
155  
156  
157  
158  
159  
160  
161  
162  
163  
164  
165  
166  
167  
168  
169  
170  
171  
172  
173  
174  
175  
176  
177  
178  
179  
180  
181  
182  
183  
184  
185  
186  
187  
188  
189  
190  
191  
192  
193  
194  
195  
196  
197  
198  
199  
200  
201  
202  
203  
204  
205  
206  
207  
208  
209  
210  
211  
212  
213  
214  
215  
216  
217  
218  
219  
220  
221  
222  
223  
224  
225  
226  
227  
228  
229  
230  
231  
232  
233  
234  
235  
236  
237  
238  
239  
240  
241  
242  
243  
244  
245  
246  
247  
248  
249  
250  
251  
252  
253  
254  
255  
256  
257  
258  
259  
260  
261  
262  
263  
264  
265  
266  
267  
268  
269  
270  
271  
272  
273  
274  
275  
276  
277  
278  
279  
280  
281  
282  
283  
284  
285  
286  
287  
288  
289  
290  
291  
292  
293  
294  
295  
296  
297  
298  
299  
300  
301  
302  
303  
304  
305  
306  
307  
308  
309  
310  
311  
312  
313  
314  
315  
316  
317  
318  
319  
320  
321  
322  
323  
324  
325  
326  
327  
328  
329  
330  
331  
332  
333  
334  
335  
336  
337  
338  
339  
340  
341  
342  
343  
344  
345  
346  
347  
348  
349  
350  
351  
352  
353  
354  
355  
356  
357  
358  
359  
360  
361  
362  
363  
364  
365  
366  
367  
368  
369  
370  
371  
372  
373  
374  
375  
376  
377  
378  
379  
380  
381  
382  
383  
384  
385  
386  
387  
388  
389  
390  
391  
392  
393  
394  
395  
396  
397  
398  
399  
400  
401  
402  
403  
404  
405  
406  
407  
408  
409  
410  
411  
412  
413  
414  
415  
416  
417  
418  
419  
420  
421  
422  
423  
424  
425  
426  
427  
428  
429  
430  
431  
432  
433  
434  
435  
436  
437  
438  
439  
440  
441  
442  
443  
444  
445  
446  
447  
448  
449  
450  
451  
452  
453  
454  
455  
456  
457  
458  
459  
460  
461  
462  
463  
464  
465  
466  
467  
468  
469  
470  
471  
472  
473  
474  
475  
476  
477  
478  
479  
480  
481  
482  
483  
484  
485  
486  
487  
488  
489  
490  
491  
492  
493  
494  
495  
496  
497  
498  
499  
500  
501  
502  
503  
504  
505  
506  
507  
508  
509  
510  
511  
512  
513  
514  
515  
516  
517  
518  
519  
520  
521  
522  
523  
524  
525  
526  
527  
528  
529  
530  
531  
532  
533  
534  
535  
536  
537  
538  
539  
540  
541  
542  
543  
544  
545  
546  
547  
548  
549  
550  
551  
552  
553  
554  
555  
556  
557  
558  
559  
560  
561  
562  
563  
564  
565  
566  
567  
568  
569  
570  
571  
572  
573  
574  
575  
576  
577  
578  
579  
580  
581  
582  
583  
584  
585  
586  
587  
588  
589  
590  
591  
592  
593  
594  
595  
596  
597  
598  
599  
600  
601  
602  
603  
604  
605  
606  
607  
608  
609  
610  
611  
612  
613  
614  
615  
616  
617  
618  
619  
620  
621  
622  
623  
624  
625  
626  
627  
628  
629  
630  
631  
632  
633  
634  
635  
636  
637  
638  
639  
640  
641  
642  
643  
644  
645  
646  
647  
648  
649  
650  
651  
652  
653  
654  
655  
656  
657  
658  
659  
660  
661  
662  
663  
664  
665  
666  
667  
668  
669  
670  
671  
672  
673  
674  
675  
676  
677  
678  
679  
680  
681  
682  
683  
684  
685  
686  
687  
688  
689  
690  
691  
692  
693  
694  
695  
696  
697  
698  
699  
700  
701  
702  
703  
704  
705  
706  
707  
708  
709  
710  
711  
712  
713  
714  
715  
716  
717  
718  
719  
720  
721  
722  
723  
724  
725  
726  
727  
728  
729  
730  
731  
732  
733  
734  
735  
736  
737  
738  
739  
740  
741  
742  
743  
744  
745  
746  
747  
748  
749  
750  
751  
752  
753  
754  
755  
756  
757  
758  
759  
760  
761  
762  
763  
764  
765  
766  
767  
768  
769  
770  
771  
772  
773  
774  
775  
776  
777  
778  
779  
780  
781  
782  
783  
784  
785  
786  
787  
788  
789  
790  
791  
792  
793  
794  
795  
796  
797  
798  
799  
800  
801  
802  
803  
804  
805  
806  
807  
808  
809  
810  
811  
812  
813  
814  
815  
816  
817  
818  
819  
820  
821  
822  
823  
824  
825  
826  
827  
828  
829  
830  
831  
832  
833  
834  
835  
836  
837  
838  
839  
840  
841  
842  
843  
844  
845  
846  
847  
848  
849  
850  
851  
852  
853  
854  
855  
856  
857  
858  
859  
860  
861  
862  
863  
864  
865  
866  
867  
868  
869  
870  
871  
872  
873  
874  
875  
876  
877  
878  
879  
880  
881  
882  
883  
884  
885  
886  
887  
888  
889  
890  
891  
892  
893  
894  
895  
896  
897  
898  
899  
900  
901  
902  
903  
904  
905  
906  
907  
908  
909  
910  
911  
912  
913  
914  
915  
916  
917  
918  
919  
920  
921  
922  
923  
924  
925  
926  
927  
928  
929  
930  
931  
932  
933  
934  
935  
936  
937  
938  
939  
940  
941  
942  
943  
944  
945  
946  
947  
948  
949  
950  
951  
952  
953  
954  
955  
956  
957  
958  
959  
960  
961  
962  
963  
964  
965  
966  
967  
968  
969  
970  
971  
972  
973  
974  
975  
976  
977  
978  
979  
980  
981  
982  
983  
984  
985  
986  
987  
988  
989  
990  
991  
992  
993  
994  
995  
996  
997  
998  
999  
1000

1  
2  
3  
4 evaluation tools of MGD and DED, outcomes, quality assessment (Newcastle–Ottawa Scale).

5  
6 Authors of primary studies will be contacted to obtain missing data.  
7

### 8 9 **Quality assessment**

10  
11  
12 Quality of contained studies will be estimated by two reviewers (HY and QH) with the Newcastle-  
13  
14 Ottawa Quality Scale (NOS) adapted for observational studies. The scale awards 0-9 star based on  
15  
16 the selection, comparability and outcome(cohort) or exposure(case-control). Studies with 0-3 stars,  
17  
18 4-6 stars, or 7-9 stars are considered as a low-, moderate-, or high-quality. Controversies between  
19  
20 two reviewers will be settled by discussion or consulting YG.  
21  
22

### 23 **Data synthesis and statistical analysis**

24  
25  
26 At least 5 studies of same outcomes in similar populations will be pooled to perform the meta-  
27  
28 analysis by RevMan V.5.4.1. Otherwise, a systematic review will be implemented. For categorical  
29  
30 variables, the odds ratio (OR) with 95% confidence interval (CI) will be used. For continuous  
31  
32 variables, we will choose mean difference (MD) or standardized mean difference (SMD) with 95%  
33  
34 CI, depending on whether the measurement scale is consistent or not.  
35  
36

### 37 **Assessment of heterogeneity**

38  
39  
40 Chi-square statistic and the  $I^2$  test are utilized to estimate the statistical heterogeneity among  
41  
42 included studies.  $P < 0.1$  is considered as representative of statistically heterogeneity.<sup>20</sup>  $I^2$  values of  
43  
44  $<25\%$ ,  $25\%-50\%$  and  $>50\%$  representing low, medium and high heterogeneity.<sup>21</sup> For a significant  
45  
46 heterogeneity( $I^2 > 50\%, P < 0.1$ ), a random-effect model will be selected to synthesize the data.  
47  
48  
49 Otherwise, a fixed effect model will be used.  
50  
51

### 52 **Subgroup analysis**

53  
54  
55  
56 Subgroup analysis is applied to high heterogeneity among publications included with following  
57  
58 aspects, such as diagnostic criteria for pSS, study design, different evaluation tools of MGD and  
59  
60 DED.

### **Sensitivity analysis**

Eliminate literatures one by one to conduct sensitivity analysis. possible major source of heterogeneity may be found.

### **Assessment of publication bias**

Visual assessment of the funnel plot will be applied to appraise publication bias if more than 10 articles are contained.<sup>22</sup>

### **Quality of evidence**

The Grading of Recommendations Assessment, Development and Evaluation(GRADE) will be used to assess the strength evidence for each outcome, which will be divided into high, moderate, low and very low level.<sup>23</sup>

### **Ethics and dissemination**

Ethical approval is not required since this meta-analysis is performed based on the published studies.

The results will be published in a peer-reviewed journal.

## **DISCUSSION**

Symptoms of MGD have a significant impact on quality of life, causing not only ocular irritation, but also the sequelae of ocular surface inflammation and resultant deficits in visual function.<sup>24</sup> SSDE is a complicated disease, that needs multidisciplinary participation. More attention should be paid to MGD. To our knowledge, this is the first systematic review and meta-analysis to evaluate the relationship between meibomian gland dysfunction and primary Sjögren's syndrome dry eye. Different types of design, diagnostic criteria of pSS, and various evaluation tools of MGD and DED will give a limit to this study, which may restrict quality of the evidence. Yet subgroup analysis may decrease these restrictions.

1  
2  
3  
4 **Contributors** CZ and QH are joint first authors. CZ designed the study protocol and registered the  
5 protocol on the PROSPERO database. CZ and QH drafted the manuscript. TH and YR will search,  
6 select studies independently, and HY with QH will extract data and assess quality of studies  
7 included. YG will be the third reviewer for study selection, data extraction and quality assessment.  
8 CZ and QH revised the final study. All authors reviewed and approved the final manuscript for  
9 submission.

10  
11  
12  
13  
14  
15  
16 **Funding** This work was supported by Science and technology development fund of Hospital of  
17 Chengdu University of traditional Chinese Medicine(19LW19、 18MZ12).

18  
19  
20  
21 **Competing interests** None declared.

22  
23 **Patient consent for publication** Not required.

24  
25 **Ethics approval** Not required.

26  
27 **Provenance and peer review** Not commissioned; externally peer reviewed.

28  
29 **Open access** This is an open access article distributed in accordance with the Creative Commons  
30 Attribution Non Commercial (CC BY-NC 4.0) license, which permits others to distribute, remix,  
31 adapt, build upon this work non-commercially, and license their derivative works on different  
32 terms, provided the original work is properly cited, appropriate credit is given, any changes made  
33 indicated, and the use is non-commercial. See: <http://creativecommons.org/licenses/by-nc/4.0/>.

34  
35  
36  
37  
38  
39  
40  
41 **ORCID iD**

42 Changyan Zi <https://orcid.org/0000-0001-5369-6812>

## REFERENCES

- 1 Craig JP, Nichols KK, Akpek EK, et al. TFOS DEWS II Definition and Classification Report. *The Ocular Surface* 2017;15:276-83.
- 2 Akpek EK, Bunya VY, Saldanha IJ. Sjögren's syndrome: more than just dry eye. *Cornea* 2019;38:658–61.
- 3 Vijmasi T, Chen FY, Chen YT, et al. Topical administration of interleukin-1 receptor antagonist as a therapy for aqueous-deficient dry eye in autoimmune disease. *Mol Vis* 2013;19:1957-65.
- 4 Liew MS, Zhang M, Kim E, et al. Prevalence and predictors of Sjögren's syndrome in a prospective cohort of patients with aqueous-deficient dry eye. *British Journal of Ophthalmology* 2012;96:1498-503.
- 5 Jung HH, Ji YS, Sung MS, et al. Long-term outcome of treatment with topical corticosteroids for severe dry eye associated with Sjögren's syndrome. *Chonnam Med J* 2015;51:26–32.
- 6 Menzies KL, Srinivasan S, Prokopich CL, et al. Infrared imaging of meibomian glands and evaluation of the lipid layer in Sjögren's syndrome patients and nondry eye controls. *Invest Ophthalmol Vis Sci* 2015;56:836-41.
- 7 Nelson JD, Shimazaki J, Benitez-del-Castillo JM, et al. The international workshop on meibomian gland dysfunction: report of the definition and classification subcommittee. *Invest Ophthalmol Vis Sci* 2011;52:1930-7.
- 8 Vehof J, Utheim TP, Bootsma H, et al. Advances, limitations and future perspectives in the diagnosis and management of dry eye in Sjögren's syndrome. *Clinical and Experimental Rheumatology* 2020;38;S301-9.
- 9 Chan TCY, Chow SSW, Wan KHN, et al. Update on the association between dry eye disease and meibomian gland dysfunction. *Hong Kong Med J* 2019;25:38-47.
- 10 Shimazaki J, Goto E, Ono M, et al. Meibomian gland dysfunction in patients with Sjögren syndrome. *Ophthalmology* 1998;105:1485-8.
- 11 Zang S, Cui Y, Cui Y, et al. Meibomian gland dropout in Sjögren's syndrome and non-Sjögren's dry eye patients. *Eye* 2018;32:1681–7.
- 12 Wang Y, Qin Q, Liu B, et al. Clinical Analysis: Aqueous-deficient and meibomian gland

- dysfunction in patients with primary sjogren's syndrome. *Front Med (Lausanne)* 2019;6:291.
- 13 Goto E, Matsumoto Y, Kamoi M, et al. Tear evaporation rates in Sjögren syndrome and non-Sjögren dry eye patients. *Am J Ophthalmol* 2007;144:81–5.
- 14 Moher D, Shamseer L, Clarke M, et al. Preferred reporting items for systematic review and meta-analysis protocols (PRISMA- P) 2015 statement. *Syst Rev* 2015;4:1.
- 15 Vitali C, Bombardieri S, Jonsson R, et al. Classification criteria for Sjögren's syndrome: a revised version of the European criteria proposed by the American-European Consensus Group. *Ann Rheum Dis* 2002;61:554-8.
- 16 Shiboski SC, Shiboski CH, Criswell L, et al. American College of Rheumatology classification criteria for Sjögren's syndrome: a data-driven, expert consensus approach in the Sjögren's International Collaborative Clinical Alliance cohort. *Arthritis Care Res (Hoboken)* 2012;64:475-87.
- 17 Shiboski CH, Shiboski SC, Seror R, et al. 2016 American College of Rheumatology/European League Against Rheumatism Classification Criteria for Primary Sjögren's Syndrome: A Consensus and Data-Driven Methodology Involving Three International Patient Cohorts. *Arthritis Rheumatol* 2017;69:35-45.
- 18 Beckman KA, Luchs J, Milner MS. Making the diagnosis of Sjögren's syndrome in patients with dry eye. *Clin Ophthalmol* 2015;10:43-53.
- 19 Yoo YS, Na KS, Kim DY, et al. Morphological evaluation for diagnosis of dry eye related to meibomian gland dysfunction. *Exp Eye Res* 2017;163:72-77.
- 20 Pandis N. The chi-square test. *Am J Orthod Dentofacial Orthop* 2016;150:898-9.
- 21 Melsen WG, Bootsma MC, Rovers MM, et al. The effects of clinical and statistical heterogeneity on the predictive values of results from meta-analyses. *Clin Microbiol Infect* 2014;20:123–9.
- 22 Debray TPA, Moons KGM, Riley RD. Detecting small-study effects and funnel plot asymmetry in meta-analysis of survival data: A comparison of new and existing tests. *Res Synth Methods* 2018;9:41-50.
- 23 Guyatt G, Oxman AD, Akl EA, et al. Grade guidelines: 1. Introduction-GRADE evidence profiles and summary of findings tables. *J Clin Epidemiol* 2011;64:383–94.
- 24 Sabeti S, Kheirkhah A, Yin J, et al. Management of meibomian gland dysfunction: a review.



1  
2  
3  
4 *Surv Ophthalmol* 2020;65:205-217.  
5  
6  
7  
8  
9  
10  
11  
12  
13  
14  
15  
16  
17  
18  
19  
20  
21  
22  
23  
24  
25  
26  
27  
28  
29  
30  
31  
32  
33  
34  
35  
36  
37  
38  
39  
40  
41  
42  
43  
44  
45  
46  
47  
48  
49  
50  
51  
52  
53  
54  
55  
56  
57  
58  
59  
60

For peer review only

1  
2  
3  
4  
5  
6  
7  
8  
9  
10  
11  
12  
13  
14  
15  
16  
17  
18  
19  
20  
21  
22  
23  
24  
25  
26  
27  
28  
29  
30  
31  
32  
33  
34  
35  
36  
37  
38  
39  
40  
41  
42  
43  
44  
45  
46  
47  
48  
49  
50  
51  
52  
53  
54  
55  
56  
57  
58  
59  
60



Figure 1. Flow chart and descriptions of study selection.

210x297mm (200 x 200 DPI)

# Reporting checklist for protocol of a systematic review.

Based on the PRISMA-P guidelines.

## Instructions to authors

Complete this checklist by entering the page numbers from your manuscript where readers will find each of the items listed below.

Your article may not currently address all the items on the checklist. Please modify your text to include the missing information. If you are certain that an item does not apply, please write "n/a" and provide a short explanation.

Upload your completed checklist as an extra file when you submit to a journal.

In your methods section, say that you used the PRISMA-Reporting guidelines, and cite them as:

Moher D, Shamseer L, Clarke M, Ghersi D, Liberati A, Petticrew M, Shekelle P, Stewart LA. Preferred Reporting Items for Systematic Review and Meta-Analysis Protocols (PRISMA-P) 2015 statement. Syst Rev. 2015;4(1):1.

|                |                     |                                                                                    | Page   |
|----------------|---------------------|------------------------------------------------------------------------------------|--------|
|                |                     | Reporting Item                                                                     | Number |
| <b>Title</b>   |                     |                                                                                    |        |
| Identification | <a href="#">#1a</a> | Identify the report as a protocol of a systematic review                           | page1  |
| Update         | <a href="#">#1b</a> | If the protocol is for an update of a previous systematic review, identify as such | N/A    |

1 **Registration**

2

3

4 [#2](#) If registered, provide the name of the registry (such as page2

5

6 PROSPERO) and registration number

7

8

9

10 **Authors**

11

12

13 **Contact** [#3a](#) Provide name, institutional affiliation, e-mail address of all page1

14

15 protocol authors; provide physical mailing address of

16

17 corresponding author

18

19

20 **Contribution** [#3b](#) Describe contributions of protocol authors and identify the page 8

21

22 guarantor of the review

23

24

25

26 **Amendments**

27

28

29 [#4](#) If the protocol represents an amendment of a previously N/A

30

31 completed or published protocol, identify as such and list

32

33 changes; otherwise, state plan for documenting important

34

35 protocol amendments

36

37

38

39 **Support**

40

41

42 **Sources** [#5a](#) Indicate sources of financial or other support for the review page 8

43

44

45 **Sponsor** [#5b](#) Provide name for the review funder and / or sponsor page 8

46

47

48 **Role of sponsor or** [#5c](#) Describe roles of funder(s), sponsor(s), and / or institution(s), page 8

49

50 funder

51 if any, in developing the protocol

52

53

54 **Introduction**

55

56

57 **Rationale** [#6](#) Describe the rationale for the review in the context of what is page 3

58

59

60

1 already known

2  
3  
4 Objectives [#7](#) Provide an explicit statement of the question(s) the review will page 3,5  
5 address with reference to participants, interventions,  
6 comparators, and outcomes (PICO)  
7

8  
9  
10  
11 **Methods**

12  
13  
14 Eligibility criteria [#8](#) Specify the study characteristics (such as PICO, study design, page 4-5  
15 setting, time frame) and report characteristics (such as years  
16 considered, language, publication status) to be used as  
17 criteria for eligibility for the review  
18  
19  
20  
21

22  
23  
24 Information [#9](#) Describe all intended information sources (such as electronic page 4  
25 sources databases, contact with study authors, trial registers or other  
26 grey literature sources) with planned dates of coverage  
27  
28  
29

30  
31  
32 Search strategy [#10](#) Present draft of search strategy to be used for at least one page 4  
33 electronic database, including planned limits, such that it  
34 could be repeated  
35  
36  
37

38  
39 Study records - [#11a](#) Describe the mechanism(s) that will be used to manage page 5  
40 data management records and data throughout the review  
41  
42

43  
44 Study records - [#11b](#) State the process that will be used for selecting studies (such page 5  
45 selection process as two independent reviewers) through each phase of the  
46 review (that is, screening, eligibility and inclusion in meta-  
47 analysis)  
48  
49  
50  
51

52  
53  
54 Study records - [#11c](#) Describe planned method of extracting data from reports page 5-6  
55 data collection (such as piloting forms, done independently, in duplicate), any  
56  
57  
58

|    |                    |                      |                                                                                 |          |
|----|--------------------|----------------------|---------------------------------------------------------------------------------|----------|
| 1  | process            |                      | processes for obtaining and confirming data from investigators                  |          |
| 2  |                    |                      |                                                                                 |          |
| 3  |                    |                      |                                                                                 |          |
| 4  | Data items         | <a href="#">#12</a>  | List and define all variables for which data will be sought                     | page 6   |
| 5  |                    |                      | (such as PICO items, funding sources), any pre-planned data                     |          |
| 6  |                    |                      | assumptions and simplifications                                                 |          |
| 7  |                    |                      |                                                                                 |          |
| 8  |                    |                      |                                                                                 |          |
| 9  |                    |                      |                                                                                 |          |
| 10 |                    |                      |                                                                                 |          |
| 11 | Outcomes and       | <a href="#">#13</a>  | List and define all outcomes for which data will be sought,                     | page 5   |
| 12 |                    |                      |                                                                                 |          |
| 13 | prioritization     |                      | including prioritization of main and additional outcomes, with                  |          |
| 14 |                    |                      | rationale                                                                       |          |
| 15 |                    |                      |                                                                                 |          |
| 16 |                    |                      |                                                                                 |          |
| 17 |                    |                      |                                                                                 |          |
| 18 |                    |                      |                                                                                 |          |
| 19 | Risk of bias in    | <a href="#">#14</a>  | Describe anticipated methods for assessing risk of bias of                      | page 6   |
| 20 |                    |                      |                                                                                 |          |
| 21 | individual studies |                      | individual studies, including whether this will be done at the                  |          |
| 22 |                    |                      | outcome or study level, or both; state how this information will                |          |
| 23 |                    |                      | be used in data synthesis                                                       |          |
| 24 |                    |                      |                                                                                 |          |
| 25 |                    |                      |                                                                                 |          |
| 26 |                    |                      |                                                                                 |          |
| 27 |                    |                      |                                                                                 |          |
| 28 |                    |                      |                                                                                 |          |
| 29 | Data synthesis     | <a href="#">#15a</a> | Describe criteria under which study data will be quantitatively                 | page 6   |
| 30 |                    |                      | synthesised                                                                     |          |
| 31 |                    |                      |                                                                                 |          |
| 32 |                    |                      |                                                                                 |          |
| 33 |                    |                      |                                                                                 |          |
| 34 | Data synthesis     | <a href="#">#15b</a> | If data are appropriate for quantitative synthesis, describe                    | page 6   |
| 35 |                    |                      | planned summary measures, methods of handling data and                          |          |
| 36 |                    |                      | methods of combining data from studies, including any                           |          |
| 37 |                    |                      | planned exploration of consistency (such as I <sup>2</sup> , Kendall's $\tau$ ) |          |
| 38 |                    |                      |                                                                                 |          |
| 39 |                    |                      |                                                                                 |          |
| 40 |                    |                      |                                                                                 |          |
| 41 |                    |                      |                                                                                 |          |
| 42 |                    |                      |                                                                                 |          |
| 43 |                    |                      |                                                                                 |          |
| 44 | Data synthesis     | <a href="#">#15c</a> | Describe any proposed additional analyses (such as                              | page 6-7 |
| 45 |                    |                      | sensitivity or subgroup analyses, meta-regression)                              |          |
| 46 |                    |                      |                                                                                 |          |
| 47 |                    |                      |                                                                                 |          |
| 48 |                    |                      |                                                                                 |          |
| 49 | Data synthesis     | <a href="#">#15d</a> | If quantitative synthesis is not appropriate, describe the type                 | page 6   |
| 50 |                    |                      | of summary planned                                                              |          |
| 51 |                    |                      |                                                                                 |          |
| 52 |                    |                      |                                                                                 |          |
| 53 |                    |                      |                                                                                 |          |
| 54 |                    |                      |                                                                                 |          |
| 55 | Meta-bias(es)      | <a href="#">#16</a>  | Specify any planned assessment of meta-bias(es) (such as                        | page 7   |
| 56 |                    |                      | publication bias across studies, selective reporting within                     |          |
| 57 |                    |                      |                                                                                 |          |
| 58 |                    |                      |                                                                                 |          |
| 59 |                    |                      |                                                                                 |          |
| 60 |                    |                      |                                                                                 |          |

studies)

1  
2  
3  
4 Confidence in [#17](#) Describe how the strength of the body of evidence will be page 7  
5  
6 cumulative assessed (such as GRADE)  
7  
8 evidence  
9

10  
11 The PRISMA-P checklist is distributed under the terms of the Creative Commons Attribution License  
12  
13 CC-BY 4.0. This checklist was completed on 22. December 2020 using <https://www.goodreports.org/>,  
14  
15 a tool made by the [EQUATOR Network](#) in collaboration with [Penelope.ai](#)  
16  
17  
18  
19  
20  
21  
22  
23  
24  
25  
26  
27  
28  
29  
30  
31  
32  
33  
34  
35  
36  
37  
38  
39  
40  
41  
42  
43  
44  
45  
46  
47  
48  
49  
50  
51  
52  
53  
54  
55  
56  
57  
58  
59  
60
